# Supplementary material
Source: PubMed Central journal article supplement (PMC8728531)
Supplement: NIHMS1761382-supplement-Supplemental_Figure_1.pdf [file NIHMS1761382-supplement-Supplemental_Figure_1.pdf]

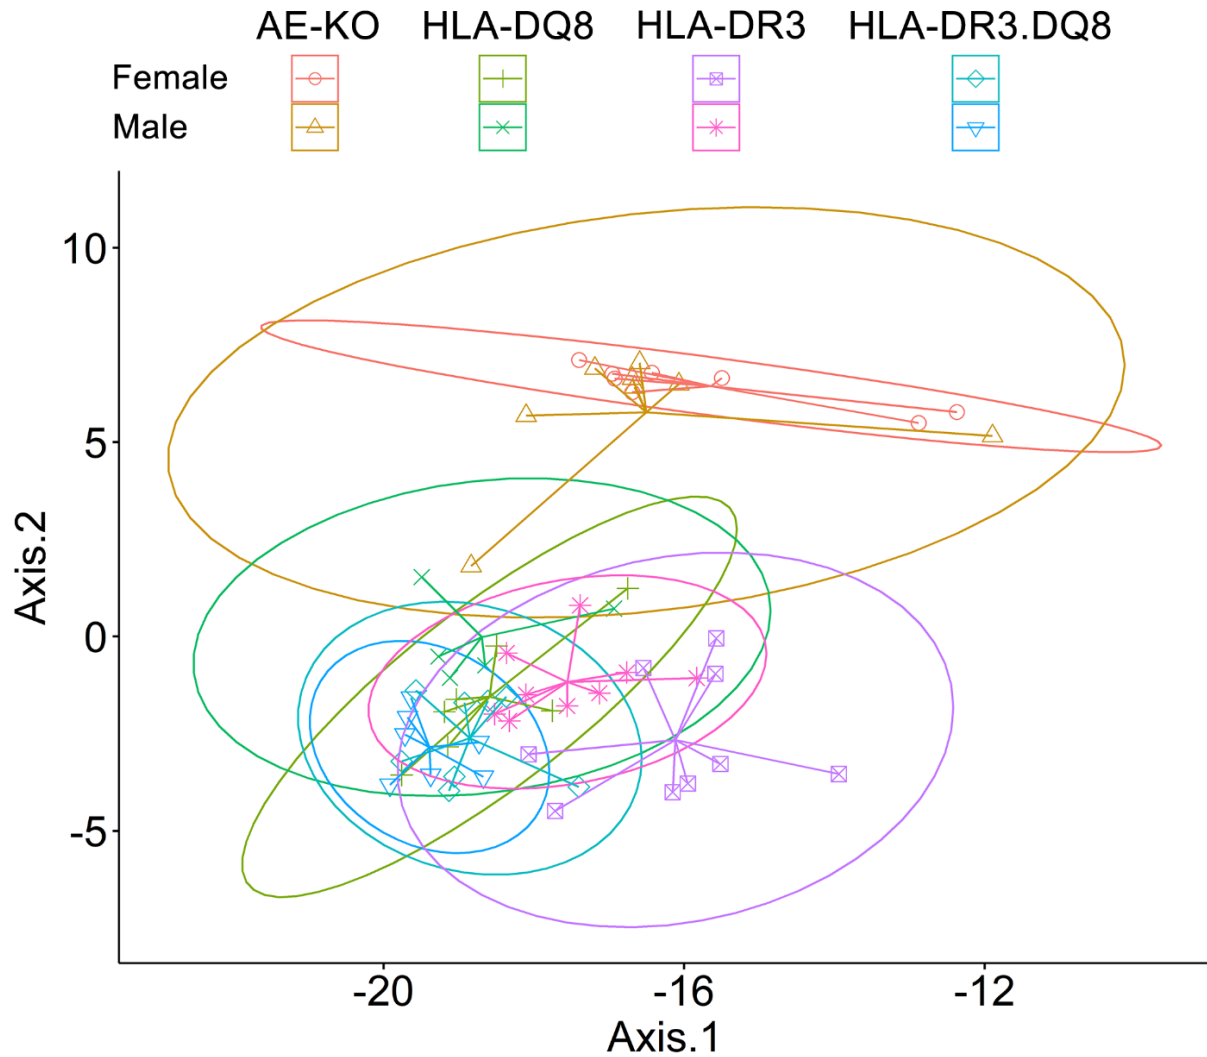

**Supplemental Figure 1. Beta-diversity clustering of all four mouse groups stratified by sex |** PCA plot comparing beta-diversity of HLA-DR3, HLA-DQ8, HLA-DR3.DQ8 transgenic mice and AE-KO control mice at the genus level demonstrated similar microbiota compositions in both sexes within each group. Axis 1 and 2 are the first and second principal components, respectively, and represent the most and second-most amount of variation in the bacterial abundance data between all the samples.
